# Supplementary material for: Experience With Cardiology-Oriented Outcomes in Critically Ill Patients With Coronavirus Disease 2019
Source: PubMed Central journal article supplement — Crit Care Explor. 2020 Dec 3;2(12):e0288. doi: 10.1097/CCE.0000000000000288 (PMC7717747; doi:10.1097/cce.0000000000000288), 2020-12-03
Supplement: cc9-2-e0288-s001.pdf [file cc9-2-e0288-s001.pdf]

Supplemental Material

Table 3 – Clinical Characteristics, Intensive Care Unit (ICU) Interventions and Outcomes of Patients Admitted to the ICU with COVID-19

| Characteristic (n [%] Unless Otherwise Indicated)                 | Total (n = 288)      | Survived hospitalization (n=202) | Died during hospitalization (n=86) | p <sup>a</sup> value |
|-------------------------------------------------------------------|----------------------|----------------------------------|------------------------------------|----------------------|
| <b>Clinical Characteristics</b>                                   |                      |                                  |                                    |                      |
| Sequential Organ Failure Assessment on admission, median (IQR)    | 6 (3-9)              | 6 (3-8)                          | 7 (3-11)                           | 0.074                |
| Troponin-I maximum, median (IQR)                                  | 0.11 (0.05-0.42)     | 0.09 (0.04-0.23)                 | 0.36 (0.08-1.29)                   | <0.001               |
| B-Natriuretic Peptide maximum, median (IQR)                       | 152 (59-503)         | 126 (51-399)                     | 371 (106-1,038)                    | <0.001               |
| D-dimer maximum, median (IQR)                                     | 7,287 (2,567-33,784) | 6,026 (2108-22,999)              | 18,740 (5,922-60,000+)             | <0.001               |
| Lactic acid maximum, median (IQR)                                 | 1.5 (1.1-2.1)        | 1.4 (1.0-2.0)                    | 1.7 (1.1-2.7)                      | 0.043                |
| C-reactive protein maximum, median (IQR)                          | 262 (117-352)        | 237 (152-327)                    | 321 (233-389)                      | <0.001               |
| PaO <sub>2</sub> /FiO <sub>2</sub> on ICU admission, median (IQR) | 164 (120-248)        | 172 (128-256)                    | 148 (102-216)                      | 0.011                |
| <b>ICU Interventions</b>                                          |                      |                                  |                                    |                      |
| Corticosteroids                                                   | 24 (9.8)             | 17 (9.9)                         | 7 (9.5)                            | 0.938                |
| Adaptive clinical treatment trial (remdesivir and/or placebo)     | 49 (17.0)            | 37 (18.3)                        | 12 (14.0)                          | 0.367                |
| Vasopressors                                                      | 183 (63.5)           | 115 (56.9)                       | 68 (79.1)                          | <0.001               |
| Vasopressor days, median (IQR)                                    | 4 (2-8)              | 4 (2-8)                          | 5 (3-9)                            | 0.057                |
| Inotropes                                                         | 30 (10.4)            | 13 (6.4)                         | 17 (19.8)                          | <0.001               |
| Inhaled vasodilator                                               | 39 (13.5)            | 21 (10.4)                        | 18 (20.9)                          | 0.017                |
| Mechanical ventilation                                            | 212 (73.6)           | 140 (69.3)                       | 72 (83.7)                          | 0.011                |
| Ventilator days, median (IQR)                                     | 9 (5-14)             | 9 (5-14)                         | 9 (5-14)                           | 0.505                |
| Any CRRT/HD                                                       | 77 (26.7)            | 36 (17.8)                        | 41 (47.7)                          | <0.001               |
| CRRT/HD days, median (IQR)                                        | 17 (12-22)           | 17 (12-19)                       | 21 (4-23)                          | 0.961                |
| <b>Outcomes</b>                                                   |                      |                                  |                                    |                      |
| ICU days, median (IQR)                                            | 9 (3-15)             | 9 (3-16)                         | 8 (4-14)                           | 0.292                |
| Hospital days, median (IQR)                                       | 15 (9- 24)           | 19 (10-27)                       | 11 (7-15)                          | <0.001               |

IQR = interquartile range

CRRT = continuous renal replacement therapy

HD = hemodialysis

<sup>a</sup> $\chi^2$  or Wilcoxon rank-sum test
