# Supplementary figures and images for: Experience With Cardiology-Oriented Outcomes in Critically Ill Patients With Coronavirus Disease 2019
Source: PubMed Central journal article supplement — Crit Care Explor. 2020 Dec 3;2(12):e0288. doi: 10.1097/CCE.0000000000000288 (PMC7717747; doi:10.1097/cce.0000000000000288), 2020-12-03

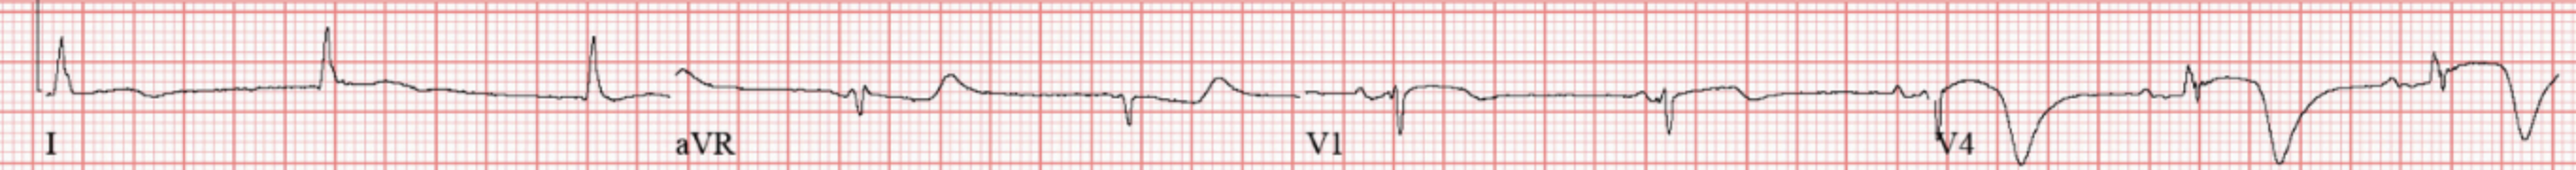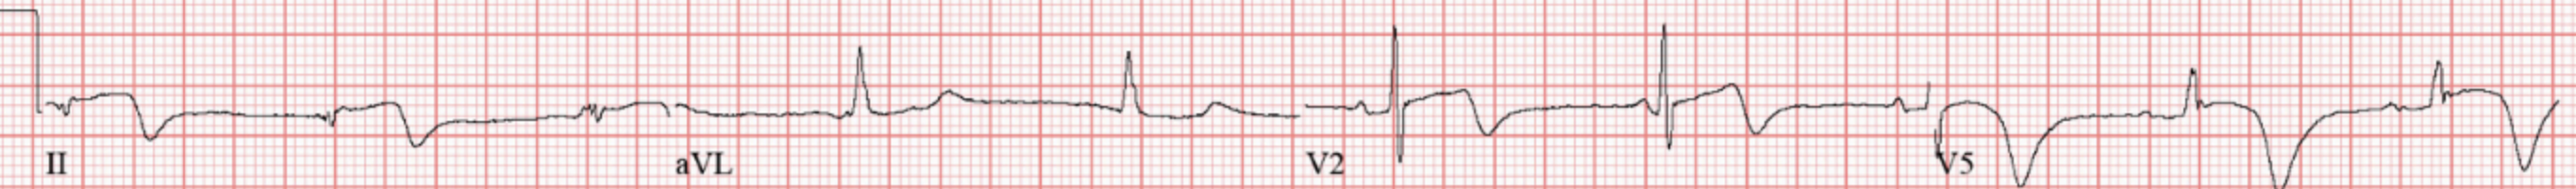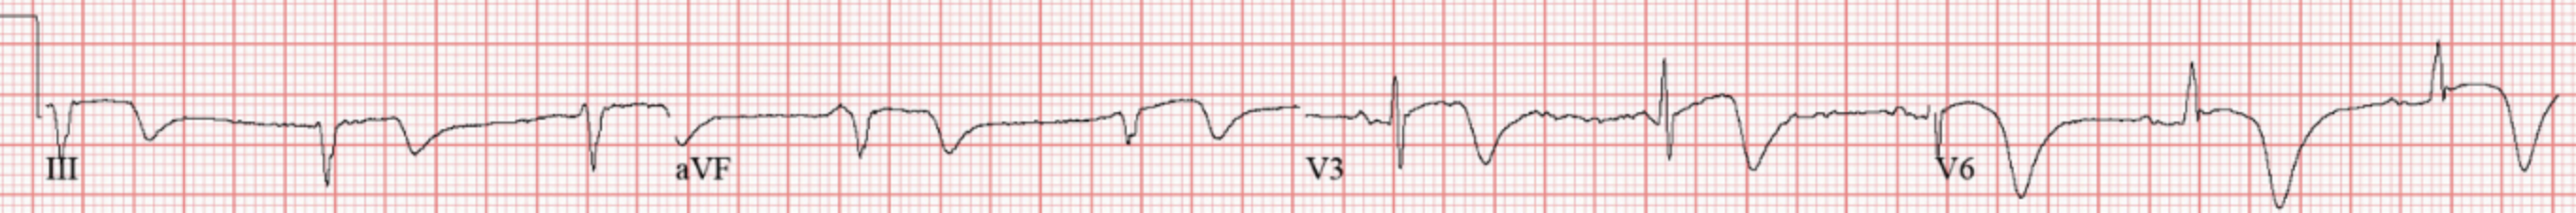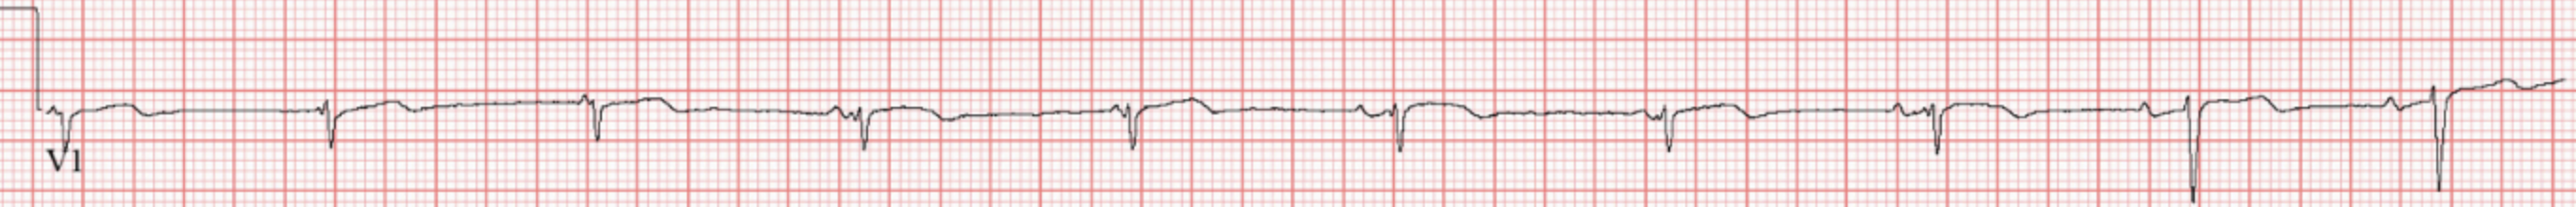

Supplement: cc9-2-e0288-s002.pdf [file cc9-2-e0288-s002.pdf]
